# Supplementary material for: A muconic acid derivative isomeric organic–inorganic metal halide with high-temperature phase transition
Source: Royal Society of Chemistry journal article supplement (doi:10.1039/d4tc00084f), 2024-01-01
Supplement: d4tc00084f1.pdf [file d4tc00084f1.pdf]

## Electronic Supplementary Information

### A muconic acid derivative organic-inorganic metal halide with high-temperature phase transition

Yan-Zi Lu,<sup>‡</sup> Jun-Chao Qi,<sup>‡</sup> Hang Peng, Zhang-Tian Xia, Xin Shen, and  
Wei-Qiang Liao\*

Ordered Matter Science Research Center, Nanchang University, Nanchang 330031,  
People's Republic of China

<sup>‡</sup> These authors contributed equally to this work.

E-mail: liaowq@ncu.edu.cn

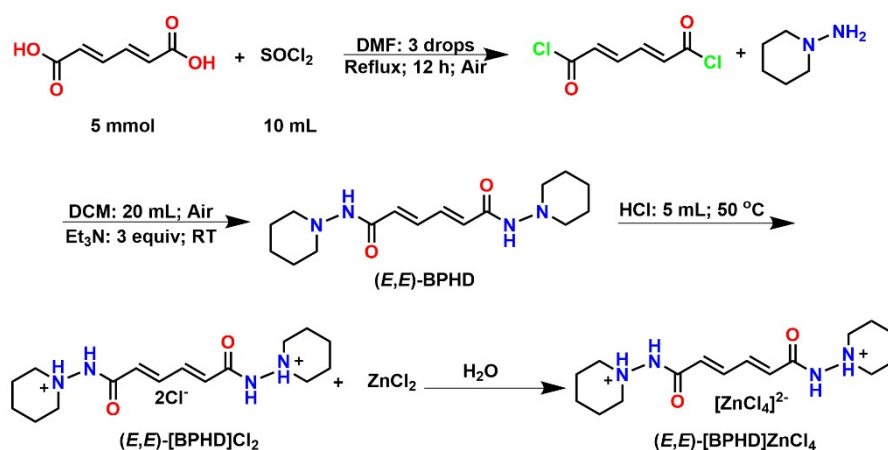

**Fig. S1** The preparation procedure of *(E,E)*-[BPHD]ZnCl<sub>4</sub>.

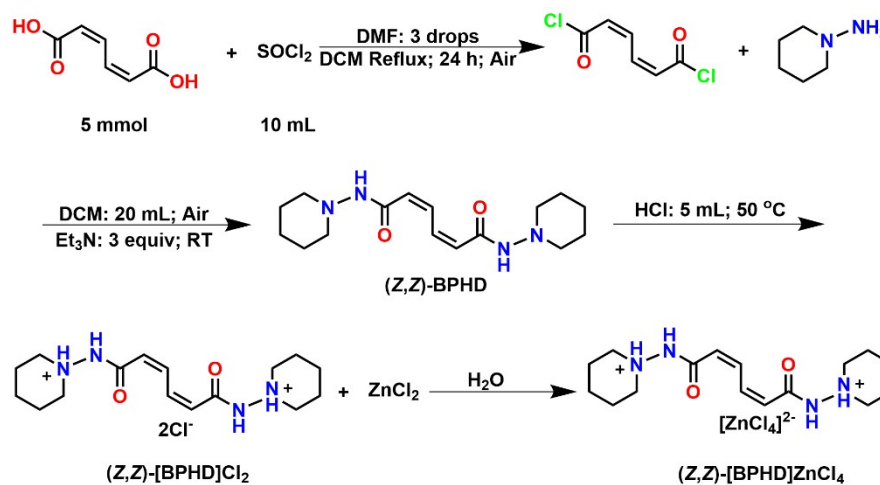

**Fig. S2** The preparation procedure of *(Z,Z)*-[BPHD]ZnCl<sub>4</sub>.

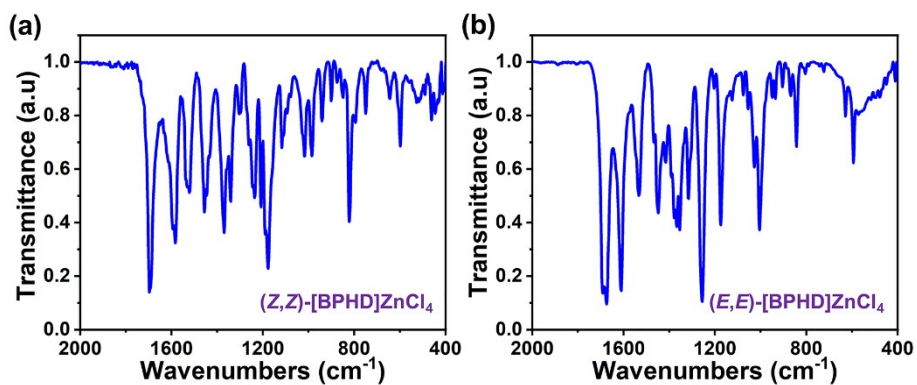

**Fig. S3** The Infrared spectrums of  $(Z,Z)$ -[BPHD]ZnCl<sub>4</sub> (a) and  $(E,E)$ -[BPHD]ZnCl<sub>4</sub> (b) at room temperature.

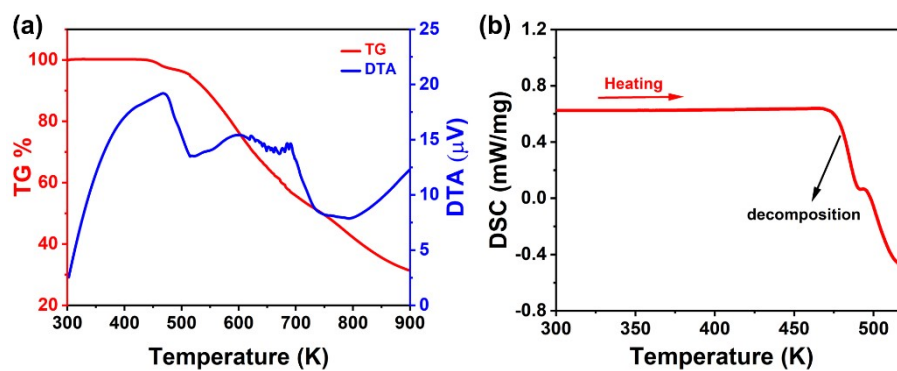

**Fig. S4** The TG-DTA (a) and DSC (b) curves of  $(Z,Z)$ -[BPHD]ZnCl<sub>4</sub>.

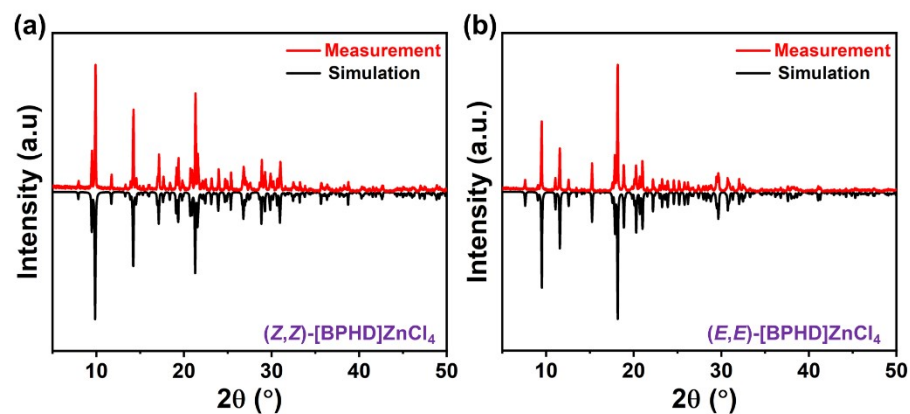

**Fig. S5** The PXRD patterns of  $(Z,Z)$ -[BPHD]ZnCl<sub>4</sub> (a) and  $(E,E)$ -[BPHD]ZnCl<sub>4</sub> (b) at room temperature.

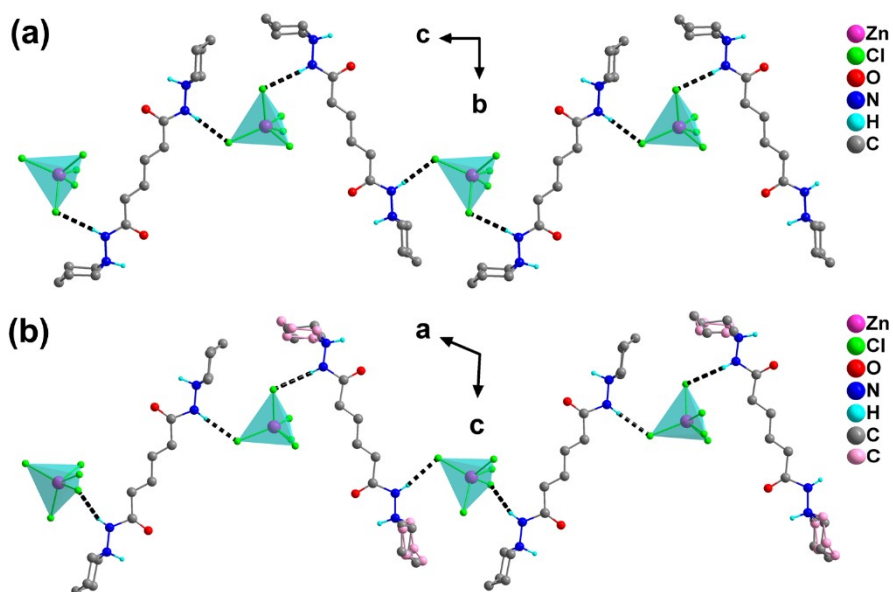

**Fig. S6** The zigzag hydrogen-bonded chain of  $(E,E)$ -[BPHD] $ZnCl_4$  in LTP (a) and HTP (b). For clarity, some H atoms are omitted. The black dotted lines represent hydrogen bonds.

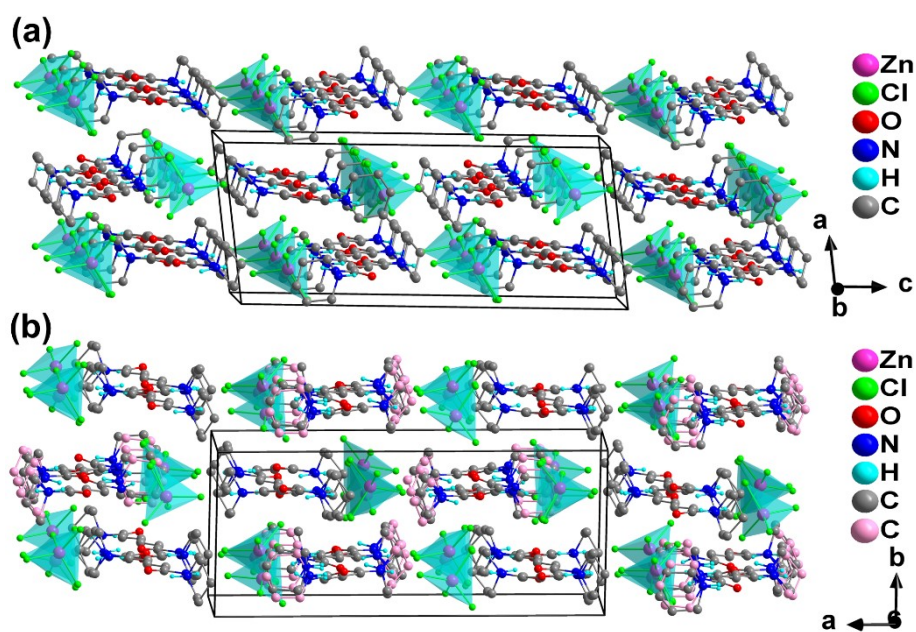

**Fig. S7** The packing diagrams of  $(E,E)$ -[BPHD] $ZnCl_4$  at LTP (a) and HTP (b). For clarity, some H atoms are omitted.

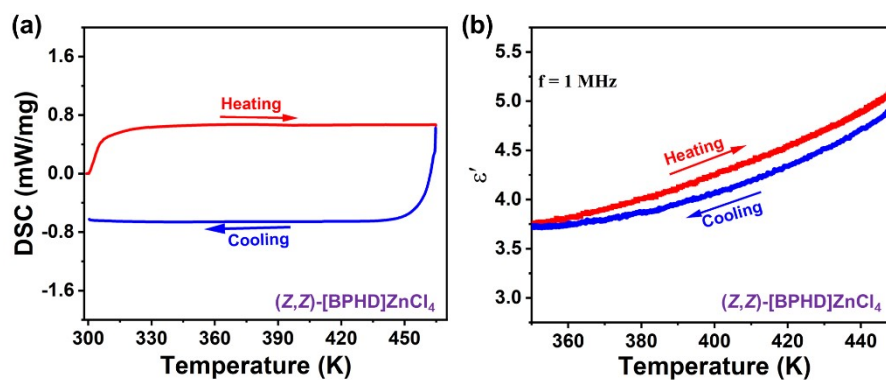

**Fig. S8** DSC curves (a) and temperature dependence of the real part of the dielectric constants ( $\epsilon'$ ) (b) of (Z,Z)-[BPHD]ZnCl<sub>4</sub>.

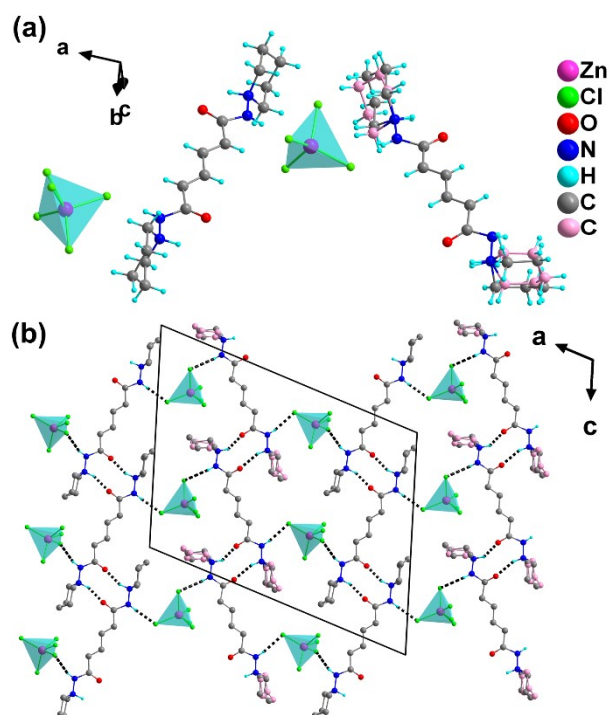

**Fig. S9** The asymmetric unit (a) and packing diagrams along *b*-axis (b) of (*E,E*)-[BPHD]ZnCl<sub>4</sub> at 458 K. For clarity, the C-H bonds in (b) are omitted. The black dotted lines represent hydrogen bonds.

**Table S1.** The  $T_c$  of some typical OIMH phase transition materials including the Zn-based ones.

| <b>Compounds</b>                        | <b><math>T_c</math></b>              | <b>References</b> |
|-----------------------------------------|--------------------------------------|-------------------|
| $[(CH_3)_3N(CH_2)_2Cl]_2ZnCl_4$         | 333 K                                | 1                 |
| $[(CH_3)_3NCH_2Cl]_2ZnCl_4$             | 258 K and 337 K                      | 2                 |
| $[CH_3CH_2NH_3]_2ZnCl_4$                | 231 K, 234 K, 237 K, 247 K and 312 K | 3                 |
| $[(CH_2)_4N(CH_2)_5]_2ZnBr_4$           | 380 K                                | 4                 |
| $[(CH_3)_3NCH_2Br]_2ZnBr_4$             | 387 K                                | 5                 |
| $[NH_3(CH_2)_6NH_3]ZnBr_4$              | 370 K and 430 K                      | 6                 |
| $[(CH_3)_3CN(CH_3)_2CH_2F]_2ZnBr_4$     | 235 K and 262 K                      | 7                 |
| $[4-(CH_3O)(C_6H_4)CH_2NH_3]_2ZnI_4$    | 359.55 K                             | 8                 |
| $[CH_3N(CH_2CH_2)_3NCH_3]ZnI_4$         | 296.8 K                              | 9                 |
| $[4-F-(C_6H_4)(CH_2)_2NH_3]_2CuCl_4$    | 348 K and 393 K                      | 10                |
| $[(CH_2CF_2CH_2CH_2)NH_2]CuCl_4$        | 380 K                                | 11                |
| $[(CH_3)_3NCH_2Cl]MnCl_3$               | 406 K                                | 12                |
| $[(CH_2)_4NH_2]MnBr_3$                  | 219 K                                | 13                |
| $[NH_3CH_2CH_2F]_3BiCl_6$               | 361.5 K                              | 14                |
| $[CH_3CH_2NH_3]_2BiBr_5$                | 120 K and 160 K                      | 15                |
| $[(CH_2)_4NH_2]_2SbCl_5$                | 236 K, 248 K and 255 K               | 16                |
| $[2-(H_3NCH_2)(C_5H_4NH)]SbI_5$         | 360 K and 390 K                      | 17                |
| $[CH_3CH_2NH_3]_4Pb_3Cl_{10}$           | 415 K                                | 18                |
| $[ICH_2N(CH_3)_3]PbI_3$                 | 312 K                                | 19                |
| $[I(CH_2)_3NH_2CH_3]_2PbI_4$            | 390 K                                | 20                |
| $[(CH_2CH_2)CF_2(CH_2CH_2)NH_2]_2PbI_4$ | 428.5 K                              | 21                |
| $[Br(CH_2)_3NH_3]_2SnCl_6$              | 284.24 K                             | 22                |
| $[Br(CH_2)_3NH_3]_2SnBr_6$              | 301.89 K                             | 22                |
| $[(CH_2)_4NHCH_3]_2SnBr_6$              | 352 K                                | 23                |
| $[CH_3PH_3]SnI_3$                       | 298 K                                | 24                |
| $[(CH_3)_3NCH_2Cl]CdCl_3$               | 400 K                                | 25                |
| $[(CH_2)_4NHCH_3]CdCl_3$                | 254 K                                | 26                |
| $[(CH_2)_3NH_2]CdBr_3$                  | 197 K, 231 K and 437 K               | 27                |
| $[(CH_2CH=CHCH_2)NH_2]CdCl_3$           | 316 K                                | 28                |
| $(E,E)$ -[BPHD] $ZnCl_4$                | 449.4 K                              | this work         |

**Table S2.** Crystal data and structure refinements for (Z,Z)-[BPHD]ZnCl<sub>4</sub> at 293 K and (E,E)-[BPHD]ZnCl<sub>4</sub> at 293 K and 458 K.

| Temperature           | (Z,Z)-[BPHD]ZnCl <sub>4</sub>      |                                    | (E,E)-[BPHD]ZnCl <sub>4</sub>      |                                    |
|-----------------------|------------------------------------|------------------------------------|------------------------------------|------------------------------------|
|                       | 293 K                              | 293 K                              | 293 K                              | 458 K                              |
| Weight                | 515.59                             | 515.59                             | 515.59                             | 515.59                             |
| Crystal system        | Monoclinic                         | Monoclinic                         | Monoclinic                         | Monoclinic                         |
| Space group           | <i>P</i> 2 <sub>1</sub> / <i>c</i> |
| <i>a</i> /Å           | 12.5308(2)                         | 9.8459(1)                          | 25.3180(14)                        |                                    |
| <i>b</i> /Å           | 15.1230(2)                         | 10.1619(1)                         | 9.9961(5)                          |                                    |
| <i>c</i> /Å           | 13.3651(2)                         | 23.4264(3)                         | 20.3268(1)                         |                                    |
| $\alpha$ /°           | 90                                 | 90                                 | 90                                 |                                    |
| $\beta$ /°            | 117.152(2)                         | 97.414(1)                          | 109.869(6)                         |                                    |
| $\gamma$ /°           | 90                                 | 90                                 | 90                                 |                                    |
| Volume/Å <sup>3</sup> | 2253.6(1)                          | 2324.3(1)                          | 4838.1(5)                          |                                    |
| Z                     | 4                                  | 4                                  | 8                                  |                                    |
| R1 [I>2σ(I)]          | 0.0274                             | 0.0641                             | 0.1440                             |                                    |
| wR2 [I>2σ(I)]         | 0.0713                             | 0.1433                             | 0.2837                             |                                    |
| GOF                   | 1.044                              | 1.081                              | 1.084                              |                                    |

**Table S3.** Selected bond lengths/Å and bond angles/° for compound (Z,Z)-[BPHD]ZnCl<sub>4</sub> at 293 K.

| Temperature | Bond lengths |          | Bond angles |           |
|-------------|--------------|----------|-------------|-----------|
| 293 K       | Zn1—Cl1      | 2.313(5) | Cl1—Zn1—Cl2 | 106.22(2) |
|             | Zn1—Cl2      | 2.250(5) | Cl1—Zn1—Cl3 | 109.31(2) |
|             | Zn1—Cl3      | 2.270(5) | Cl1—Zn1—Cl4 | 104.13(2) |
|             | Zn1—Cl4      | 2.279(5) | Cl2—Zn1—Cl3 | 111.35(2) |
|             |              |          | Cl2—Zn1—Cl4 | 114.57(2) |
|             |              |          | Cl3—Zn1—Cl4 | 110.80(2) |
|             |              |          |             |           |

**Table S4.** Selected bond lengths/Å and bond angles/° of hydrogen bonding for (Z,Z)-[BPHD]ZnCl<sub>4</sub> at 293 K.

| D—H...A                   | D—H  | H...A | D...A    | D—H...A |
|---------------------------|------|-------|----------|---------|
| N1—H1...Cl1               | 0.88 | 2.37  | 3.214(2) | 160     |
| N2—H2...Cl3 <sup>i</sup>  | 0.79 | 2.47  | 3.254(2) | 178     |
| N3—H3...Cl4               | 0.92 | 2.29  | 3.143(2) | 155     |
| N4—H4...Cl1 <sup>ii</sup> | 1.04 | 2.34  | 3.297(2) | 154     |

Symmetry codes: <sup>(i)</sup> 1-x, 1-y, 1-z; <sup>(ii)</sup> x, 3/2-y, 1/2+z.

**Table S5.** Selected bond lengths/Å and bond angles/° for compound (*E,E*)-[BPHD]ZnCl<sub>4</sub> at 293 K.

| Temperature | Bond lengths |          | Bond angles  |           |
|-------------|--------------|----------|--------------|-----------|
| 293 K       | Zn1—Cl1      | 2.252(1) | Cl1—Zn1—Cl2  | 111.78(6) |
|             | Zn1—Cl2      | 2.290(1) | Cl1—Zn1—Cl3  | 104.14(6) |
|             | Zn1—Cl3      | 2.307(2) | Cl1—Zn1—Cl4A | 117.35(2) |
|             | Zn1—Cl4A     | 2.273(7) | Cl1—Zn1—Cl4B | 104.03(4) |
|             | Zn1—Cl4B     | 2.240(4) | Cl4A—Zn1—Cl2 | 114.17(2) |
|             |              |          | Cl4B—Zn1—Cl3 | 120.88(6) |
|             |              |          | Cl4B—Zn1—Cl2 | 107.74(2) |
|             |              |          | Cl4A—Zn1—Cl3 | 99.26(2)  |
|             |              |          | Cl3—Zn1—Cl2  | 108.16(6) |

**Table S6.** Selected bond lengths/Å and bond angles/° of hydrogen bonding (*E,E*)-[BPHD]ZnCl<sub>4</sub> at 293 K.

| D—H...A                    | D—H  | H...A | D...A    | D—H...A |
|----------------------------|------|-------|----------|---------|
| N1—H1...O2 <sup>i</sup>    | 0.98 | 1.99  | 2.914(4) | 156     |
| N2—H2...Cl2                | 0.86 | 2.31  | 3.166(3) | 173     |
| N3—H3...Cl3 <sup>iii</sup> | 0.86 | 2.45  | 3.307(3) | 175     |
| N4—H4...O1 <sup>ii</sup>   | 0.98 | 1.86  | 2.732(4) | 146     |

Symmetry codes: <sup>(i)</sup> x, -1+y, z; <sup>(ii)</sup> x, 1+y, z; <sup>(iii)</sup> x, 1/2-y, -1/2+z.

**Table S7.** Selected bond lengths/Å and bond angles/° for compound (*E,E*)-[BPHD]ZnCl<sub>4</sub> at 458 K.

| Temperature | Bond lengths |           | Bond angles  |           |
|-------------|--------------|-----------|--------------|-----------|
| 458 K       | Zn1—Cl1      | 2.252(4)  | Cl1—Zn1—Cl2  | 109.60(2) |
|             | Zn1—Cl2      | 2.275(5)  | Cl2—Zn1—Cl3  | 105.21(2) |
|             | Zn1—Cl3      | 2.236(5)  | Cl3—Zn1—Cl4A | 99.12(3)  |
|             | Zn1—Cl4A     | 2.264(5)  | Cl3—Zn1—Cl4B | 112.07(3) |
|             | Zn1—Cl4B     | 2.254(6)  | Cl3—Zn1—Cl1  | 112.10(2) |
|             | Zn2—Cl5      | 2.256(5)  | Cl4A—Zn1—Cl1 | 101.82(2) |
|             | Zn2—Cl6      | 2.287(3)  | Cl4B—Zn1—Cl1 | 112.06(3) |
|             | Zn2—Cl7      | 2.247(5)  | Cl4A—Zn1—Cl2 | 128.47(2) |
|             | Zn2—Cl8A     | 2.246(10) | Cl4B—Zn1—Cl2 | 105.31(3) |
|             | Zn2—Cl8B     | 2.253(9)  | Cl6—Zn2—Cl5  | 109.79(2) |
|             |              |           | Cl6—Zn2—Cl7  | 110.63(2) |
|             |              |           | Cl6—Zn2—Cl8A | 104.82(3) |
|             |              |           | Cl5—Zn2—Cl7  | 105.13(2) |
|             |              |           | Cl5—Zn2—Cl8A | 125.83(4) |
|             |              |           | Cl5—Zn2—Cl8B | 95.25(4)  |
|             |              |           | Cl6—Zn2—Cl8B | 113.66(3) |
|             |              |           | Cl7—Zn2—Cl8B | 120.45(4) |
|             |              |           | Cl7—Zn2—Cl8A | 99.87(4)  |

**Table S8.** Selected bond lengths/Å and bond angles/° of hydrogen bonding (*E,E*)-[BPHD]ZnCl<sub>4</sub> at 458 K.

| D—H...A                    | D—H  | H...A | D...A     | D—H...A |
|----------------------------|------|-------|-----------|---------|
| N1—H1...O2 <sup>ii</sup>   | 0.98 | 1.94  | 2.868(11) | 158     |
| N2—H1B...Cl4B              | 0.86 | 2.48  | 3.229(14) | 146     |
| N3—H3...Cl6                | 0.86 | 2.23  | 3.086(9)  | 178     |
| N4—H4...O1 <sup>i</sup>    | 0.98 | 1.94  | 2.868(11) | 158     |
| N5—H5A...O4 <sup>i</sup>   | 0.98 | 1.84  | 2.678(11) | 142     |
| N5—H5B...O4 <sup>ii</sup>  | 0.98 | 1.81  | 2.678(11) | 147     |
| N6—H6...Cl5 <sup>iii</sup> | 0.86 | 2.71  | 3.310(9)  | 127     |
| N7—H7...Cl1                | 0.86 | 2.35  | 3.207(9)  | 171     |
| N8—H8A...O3 <sup>ii</sup>  | 0.98 | 2.11  | 3.006(12) | 152     |
| N8—H8B...O3 <sup>ii</sup>  | 0.98 | 2.12  | 3.006(12) | 149     |

Symmetry codes: <sup>(i)</sup> x, 3/2-y, 1/2+z; <sup>(ii)</sup> x, 3/2-y, -1/2+z; <sup>(iii)</sup> -1+x, 3/2-y, -1/2+z.



## References:

1. Y.-W. Zhang, Q. Wang, P.-P. Shi, W.-Y. Zhang, Q. Ye and D.-W. Fu, *Mater. Chem. Front.*, 2019, **3**, 2077-2082.
2. W.-Q. Liao, J.-X. Gao, X.-N. Hua, X.-G. Chen and Y. Lu, *J. Mater. Chem. C*, 2017, **5**, 11873-11878.
3. C. Ben Mohamed, K. Karoui, M. Tabellout and A. Ben Rhaiem, *J. Alloys Compd.*, 2016, **688**, 407-415.
4. Y.-F. Gao, T. Zhang, W.-Y. Zhang, Q. Ye and D.-W. Fu, *J. Mater. Chem. C*, 2019, **7**, 9840-9849.
5. J.-X. Gao, X.-N. Hua, P.-F. Li, X.-G. Chen and W.-Q. Liao, *J. Phys. Chem. C*, 2018, **122**, 23111-23116.
6. A. R. Lim and H. Ju, *RSC Adv.*, 2022, **12**, 28720-28727.
7. X. Meng, Z.-B. Liu, K. Xu, L. He, Y.-Z. Wang, P.-P. Shi and Q. Ye, *Inorg. Chem. Front.*, 2022, **9**, 1603-1608.
8. G. Teri, Q.-Q. Jia, H.-F. Ni, J.-Q. Wang, D.-W. Fu and Q. Guo, *Dalton Trans.*, 2023, **52**, 1074-1081.
9. C. Chen, S.-Y. Deng, J.-Y. Li, L.-H. Li, Q. Ji and L. Chen, *J. Mol. Struct.*, 2019, **1183**, 384-389.
10. Y.-P. Gong, X.-X. Chen, G.-Z. Huang, W.-X. Zhang and X.-M. Chen, *J. Mater. Chem. C*, 2022, **10**, 5482-5488.
11. C.-R. Huang, X. Luo, X.-G. Chen, X.-J. Song, Z.-X. Zhang and R.-G. Xiong, *Natl. Sci. Rev.*, 2021, **8**, nwa232.
12. Y.-M. You, W.-Q. Liao, D. Zhao, H.-Y. Ye, Y. Zhang, Q. Zhou, X. Niu, J. Wang, P.-F. Li, D.-W. Fu, Z. Wang, S. Gao, K. Yang, J.-M. Liu, J. Li, Y. Yan and R.-G. Xiong, *Science*, 2017, **357**, 306-309.
13. Y. Zhang, W. Q. Liao, D. W. Fu, H. Y. Ye, C. M. Liu, Z. N. Chen and R. G. Xiong, *Adv. Mater.*, 2015, **27**, 3942-3946.
14. L.-L. Chu, T. Zhang, Y.-F. Gao, W.-Y. Zhang, P.-P. Shi, Q. Ye and D.-W. Fu, *Chem. Mater.*, 2020, **32**, 6968-6974.
15. R. Jakubas, A. Gagor, M. J. Winiarski, M. Ptak, A. Piecha-Bisiorek and A. Cizman, *Inorg. Chem.*, 2020, **59**, 3417-3427.
16. M. Ksiadzyna, A. Gagor, A. M. Bisiorek, A. Cizman, W. Medycki and R. Jakubas, *J. Mater. Chem. C*, 2019, **7**, 10360-10370.
17. P.-F. Li, Y.-Y. Tang, W.-Q. Liao, H.-Y. Ye, Y. Zhang, D.-W. Fu, Y.-M. You and R.-G. Xiong, *NPG Asia Mater.*, 2017, **9**, e342.
18. S. Wang, L. Li, W. Weng, C. Ji, X. Liu, Z. Sun, W. Lin, M. Hong and J. Luo, *J. Am. Chem. Soc.*, 2020, **142**, 55-59.
19. X.-N. Hua, W.-Q. Liao, Y.-Y. Tang, P.-F. Li, P.-P. Shi, D. Zhao and R.-G. Xiong, *J. Am. Chem. Soc.*, 2018, **140**, 12296-12302.
20. R. Chakraborty, P. K. Rajput, G. M. Anilkumar, S. Maqbool, R. Das, A. Rahman, P. Mandal and A. Nag, *J. Am. Chem. Soc.*, 2023, **145**, 1378-1388.
21. H.-Y. Zhang, X.-J. Song, X.-G. Chen, Z.-X. Zhang, Y.-M. You, Y.-Y. Tang and R.-G. Xiong, *J. Am. Chem. Soc.*, 2020, **142**, 4925-4931.
22. G. Teri, H.-F. Ni, Q.-F. Luo, X.-P. Wang, J.-Q. Wang, D.-W. Fu and Q. Guo,

*Mater. Chem. Front.*, 2023, **7**, 2235-2240.

23. X. Hu, H. Xu, W. Guo, S. Han, Y. Liu, Y. Ma, Q. Fan, J. Luo and Z. Sun, *Mater. Chem. Front.*, 2023, **7**, 1599-1606.

24. H.-Y. Zhang and R.-G. Xiong, *Chem. Commun.*, 2023, **59**, 920-923.

25. H.-P. Lv, W.-Q. Liao, Y.-M. You and R.-G. Xiong, *J. Am. Chem. Soc.*, 2022, **144**, 22325-22331.

26. A. Zeb, Z. Sun, T. Khan, M. A. Asghar, Z. Wu, L. Li, C. Ji and J. Luo, *Inorg. Chem. Front.*, 2017, **4**, 1485-1492.

27. M. Rok, B. Zarychta, G. Bator and A. Piecha-Bisiorek, *J. Phys. Chem. C*, 2022, **126**, 18876-18884.

28. H.-Y. Ye, Y. Zhang, D.-W. Fu and R.-G. Xiong, *Angew. Chem. Int. Ed.*, 2014, **53**, 11242-11247.
